# Supplementary material for: Polydimethylsiloxane functionalized separator for a stable and fast lithium metal anode
Source: Royal Society of Chemistry journal article supplement (doi:10.1039/d2ce00595f), 2022-01-01
Supplement: d2ce00595f1.pdf [file d2ce00595f1.pdf]

## Supporting information

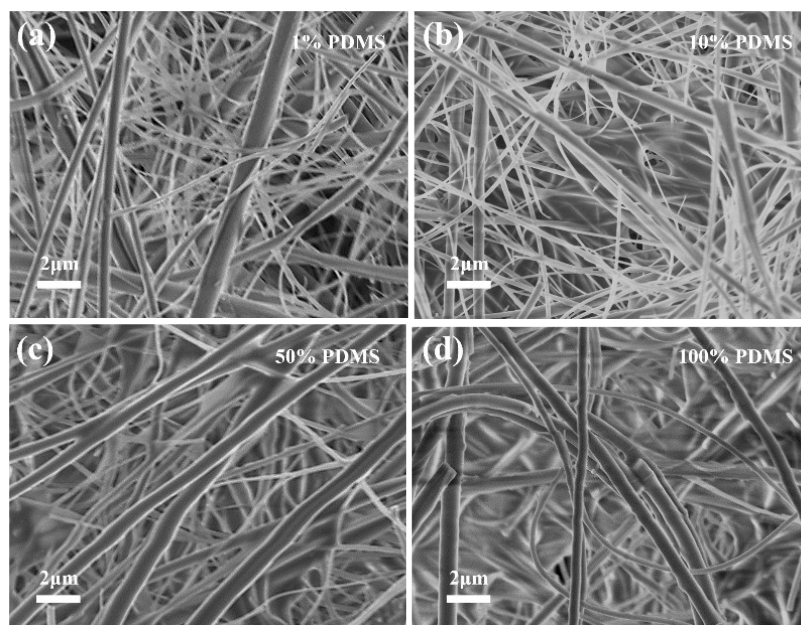

**Fig. S1** SEM images of the surface of glass fiber separator modified with different concentrations of (a) 1% PDMS; (b) 10% PDMS; (c) 50% PDMS; (d) 100% PDMS.

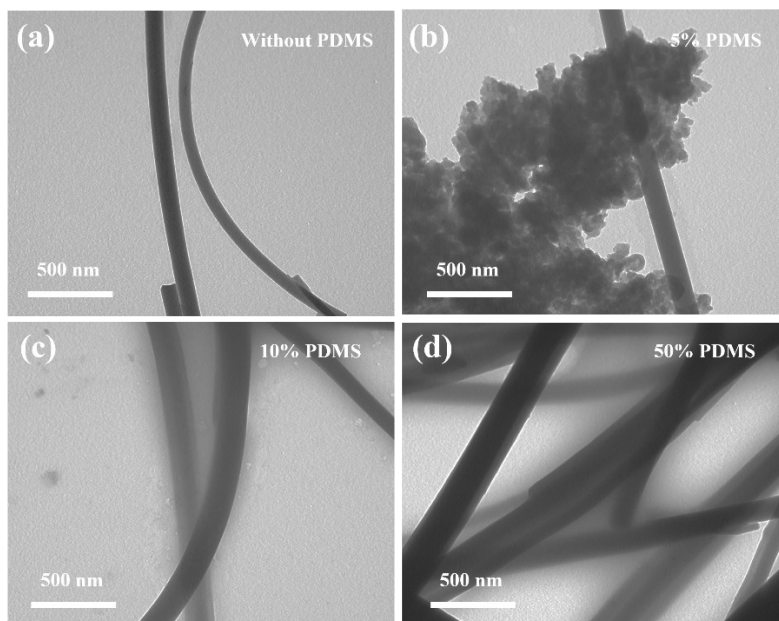

**Fig. S2** TEM images of (a) unmodified-GF, (b) 5% PDMS-GF, (c) 10% PDMS -GF and (d) 50% PDMS-GF.

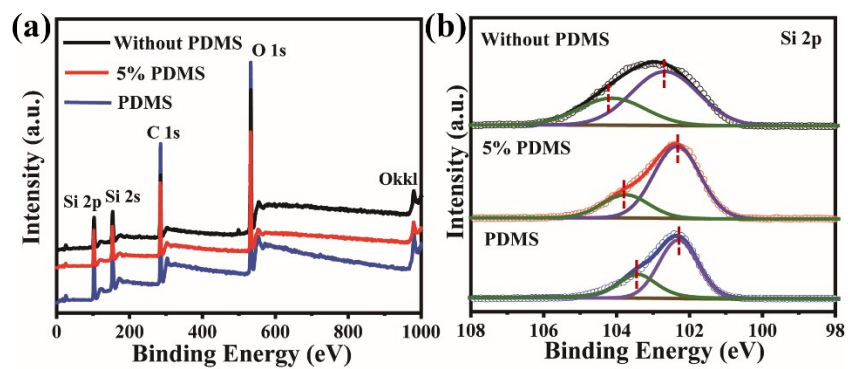

**Fig. S3** (a) XPS survey spectrum and (b) Si 2p XPS spectra of the glass fiber separator before and after 5% PDMS modification and the pure PDMS.

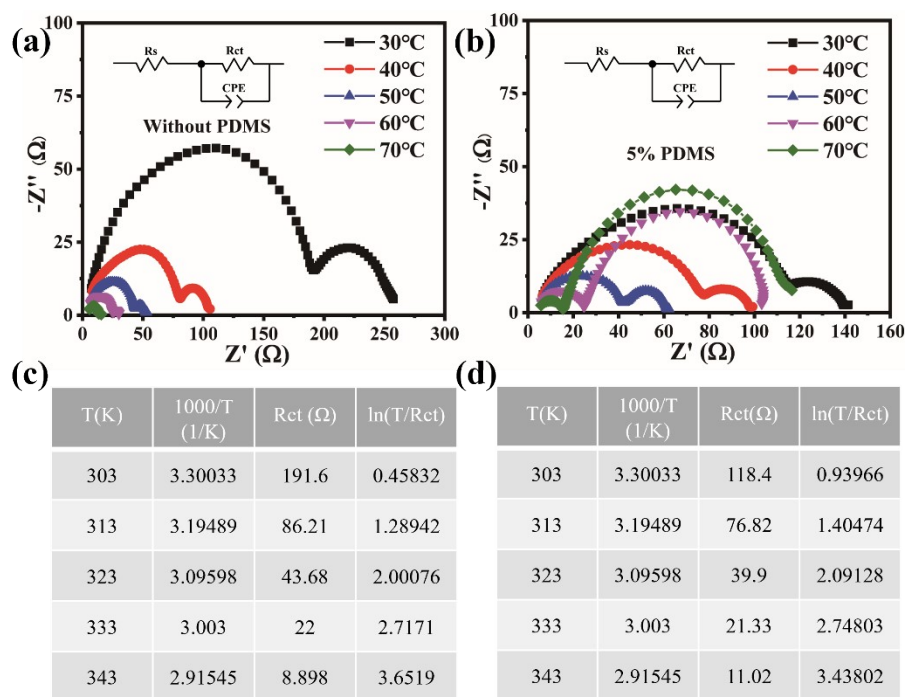

**Fig. S4** Nyquist plots at various temperatures for Li/Li cells with (a) unmodified-GF and (b) 5% PDMS-GF. Inset is the equivalent circuit model used for fitting. Corresponding data under various temperatures are listed in (c) and (d).

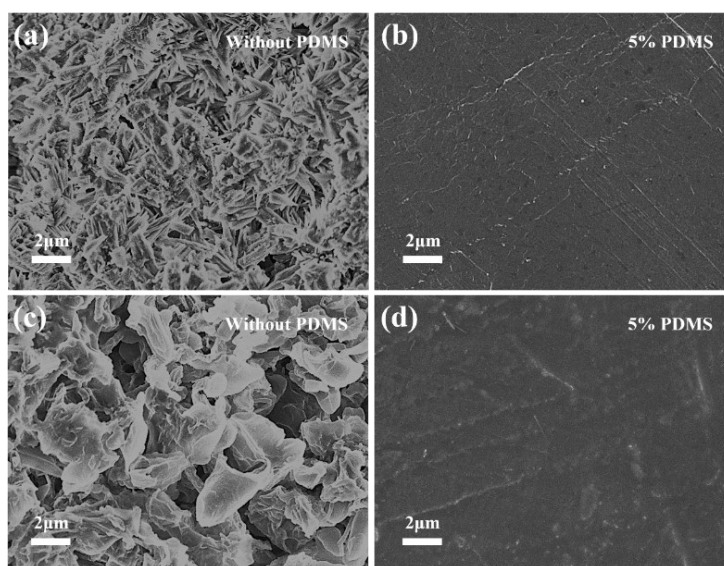

**Fig. S5** SEM images of the lithium metal anode after 20 cycles at a current density  $1 \text{ mA cm}^{-2}$  and with a capacity of  $2 \text{ mAh cm}^{-2}$  (a) and (b);  $5 \text{ mAh cm}^{-2}$  (c) and (d). With and without 5% PDMS-GF are placed on the left and right sides, respectively.

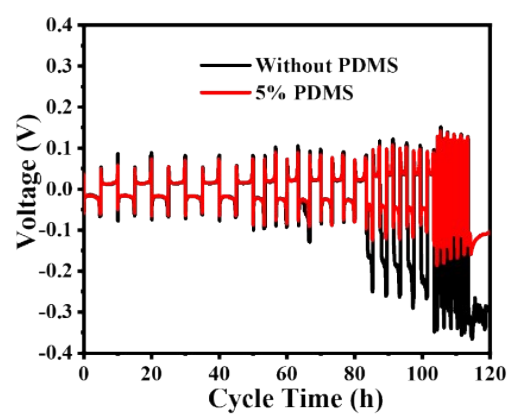

**Fig. S6** Rate performance of symmetrical batteries at current densities from 0.2 to 1 mA cm<sup>-2</sup> with 1 mAh cm<sup>-2</sup>.

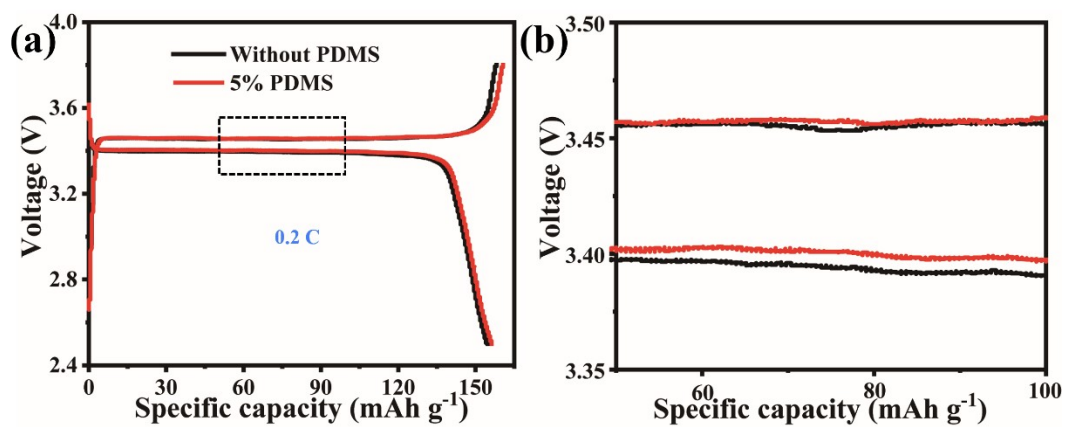

**Fig. S7** (a) Charge-discharge curves of the assembled battery with and without PDMS modification at 0.2 C and (b) enlarged image of the dashed frame in (a).
